# Supplementary material
Source: PubMed Central journal article supplement (PMC4450392)
Supplement: pnas.201418673SI.pdf [file pnas.201418673SI.pdf]

# Supporting Information

Watkins et al. 10.1073/pnas.1418673112

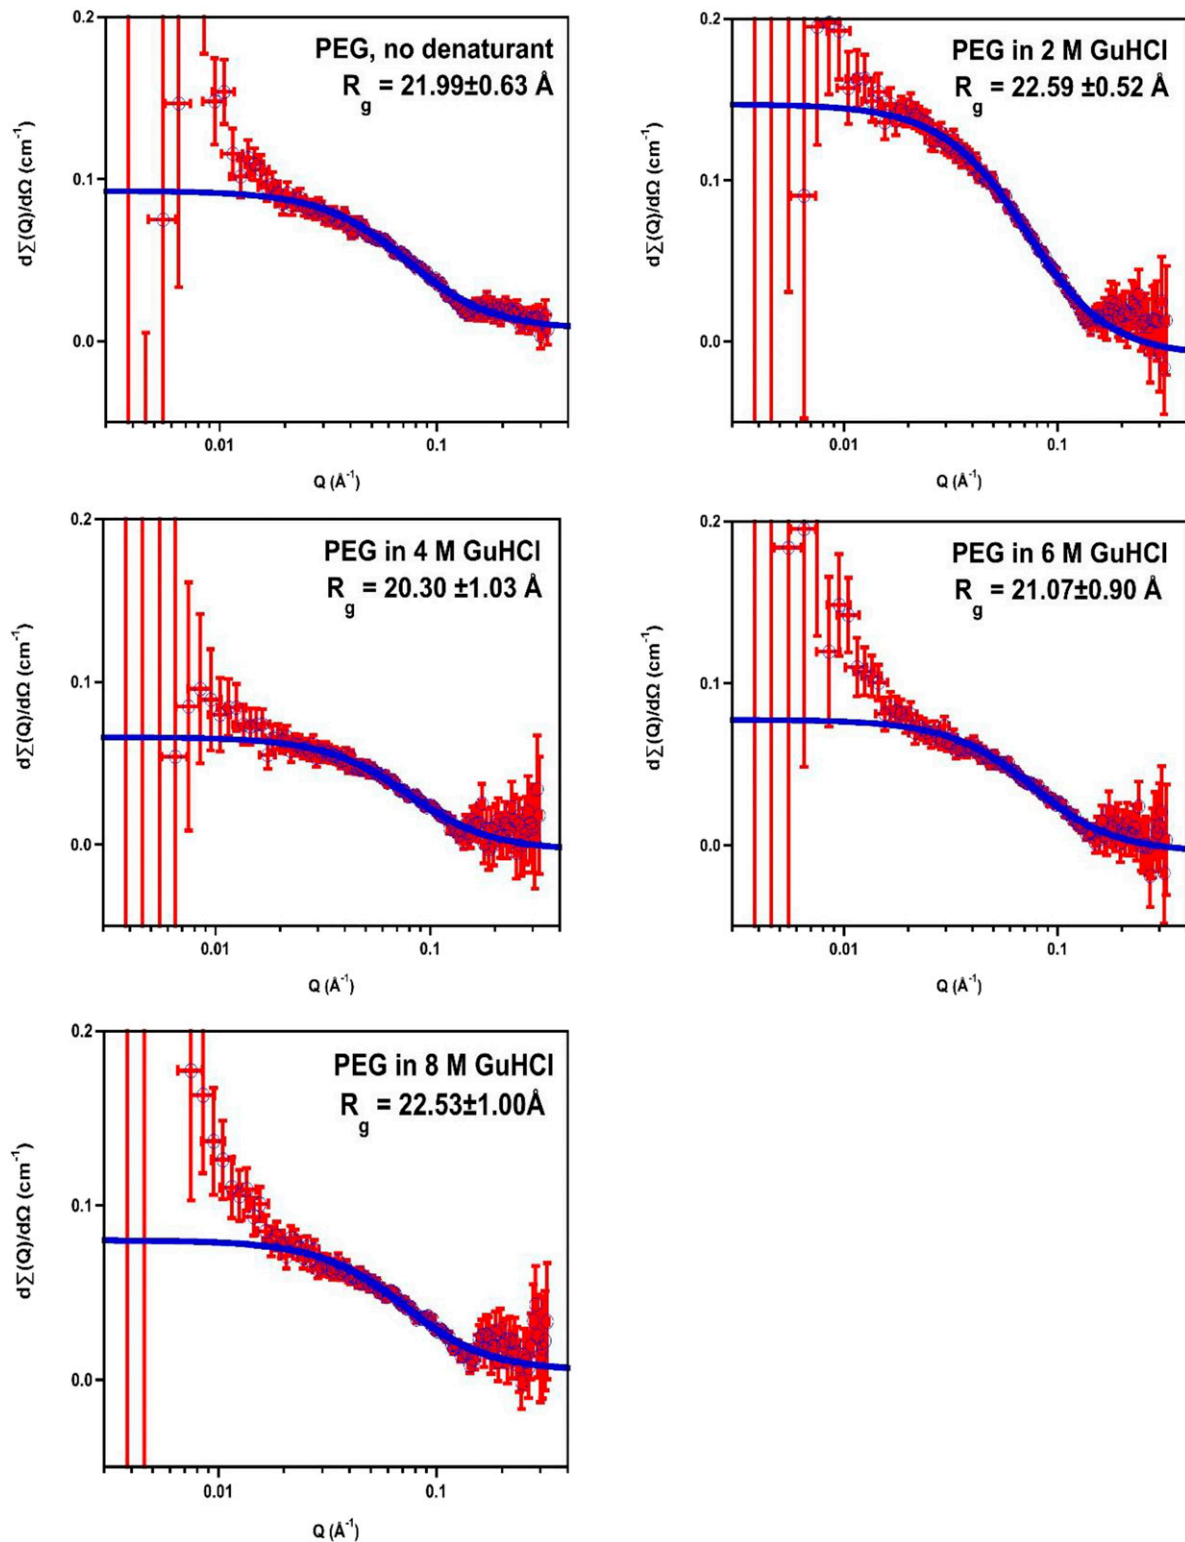

Fig. S1. Debye fit (Eq. 1) of scattering data collected on 3 kDa PEG at various GuHCl concentrations. All  $R^2$  values for these fits are  $>0.94$ . The error bars shown here and below are estimated 95% confidence intervals.

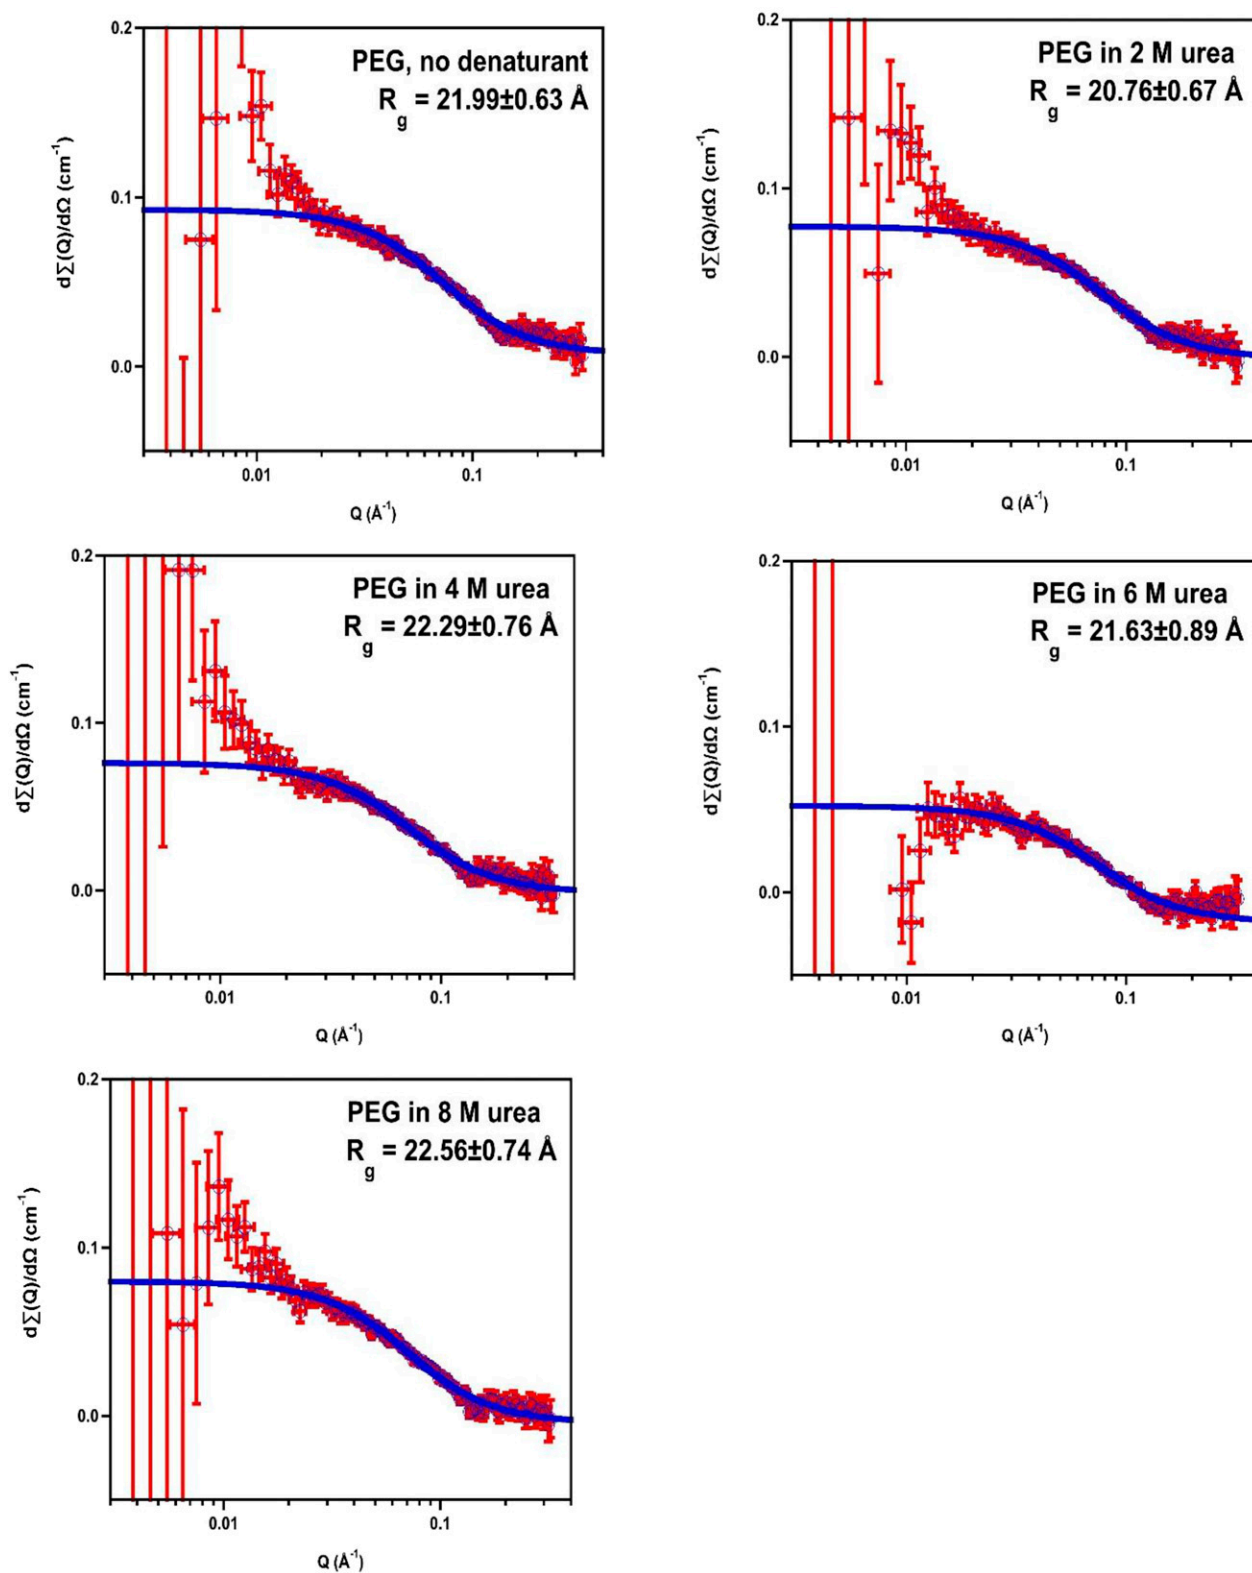

Fig. S2. Debye fit (Eq. 1) of scattering data collected on 3 kDa PEG at various urea concentrations. All  $R^2$  values for these fits are  $>0.93$ .

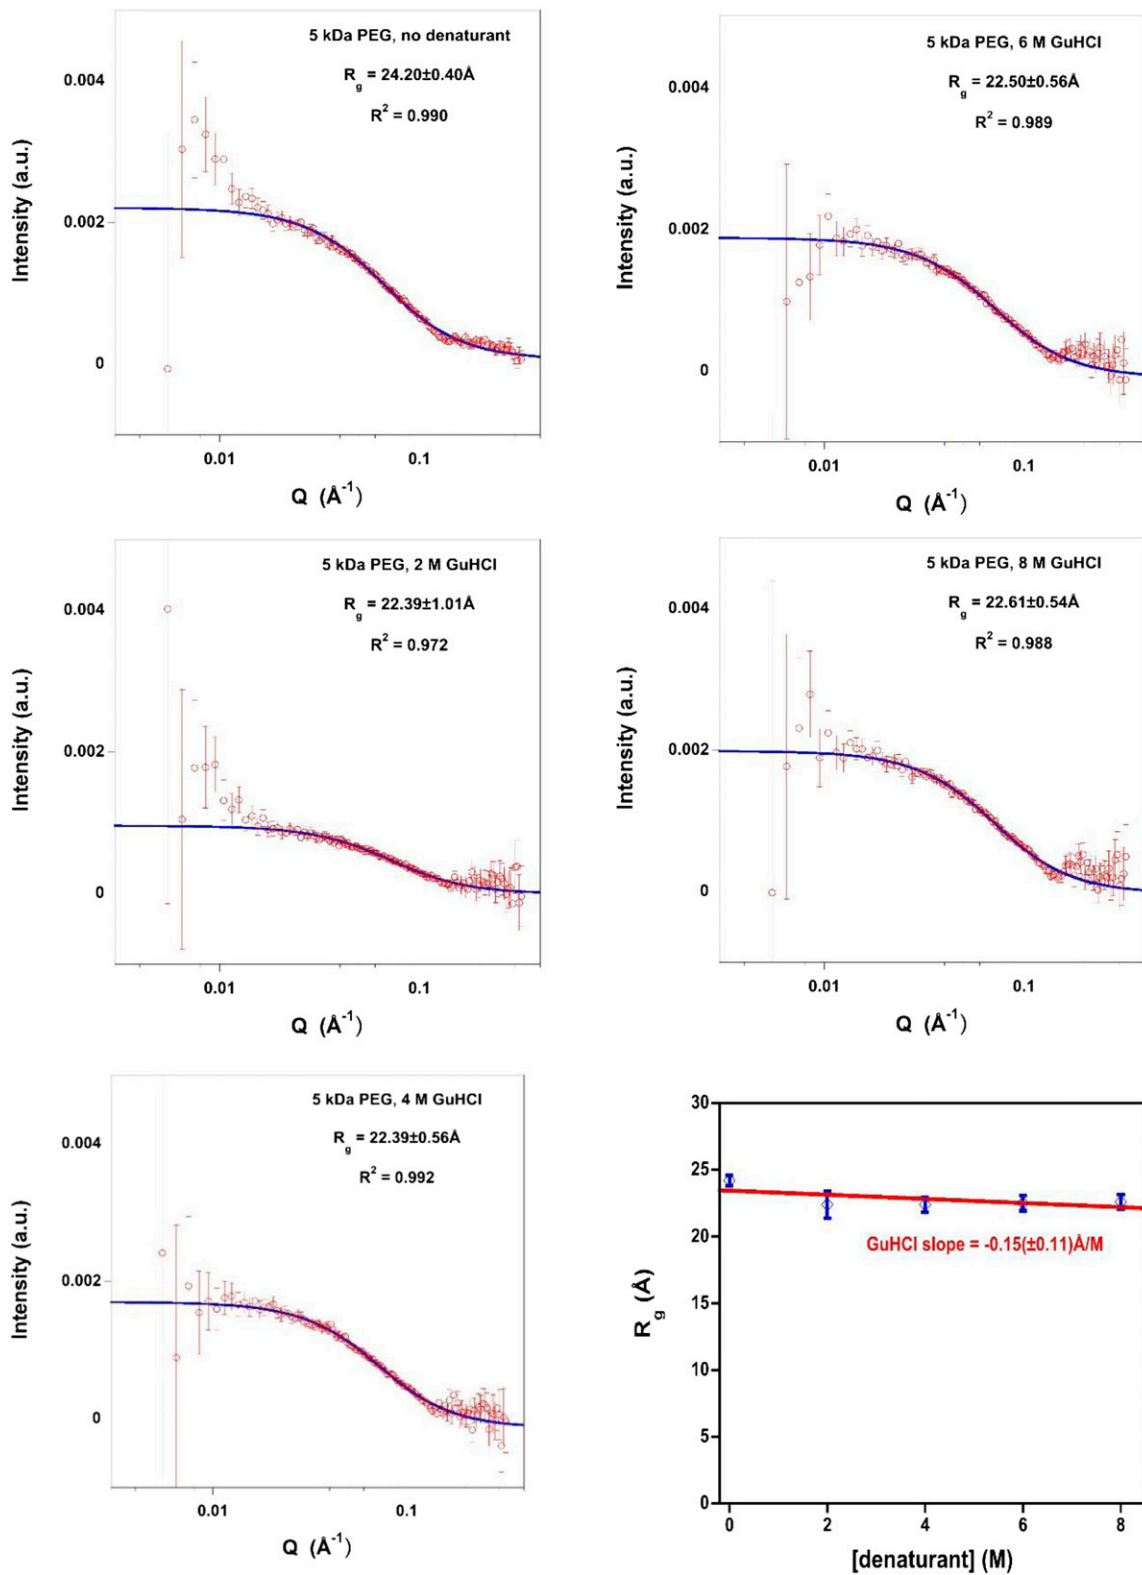

Fig. S3. Debye fits of 5 kDa PEG; as is true for 3 kDa PEG (Fig. 3 and Figs. S1 and S2), we observe no statistically significant change in the dimensions as a function of GuHCl concentration.

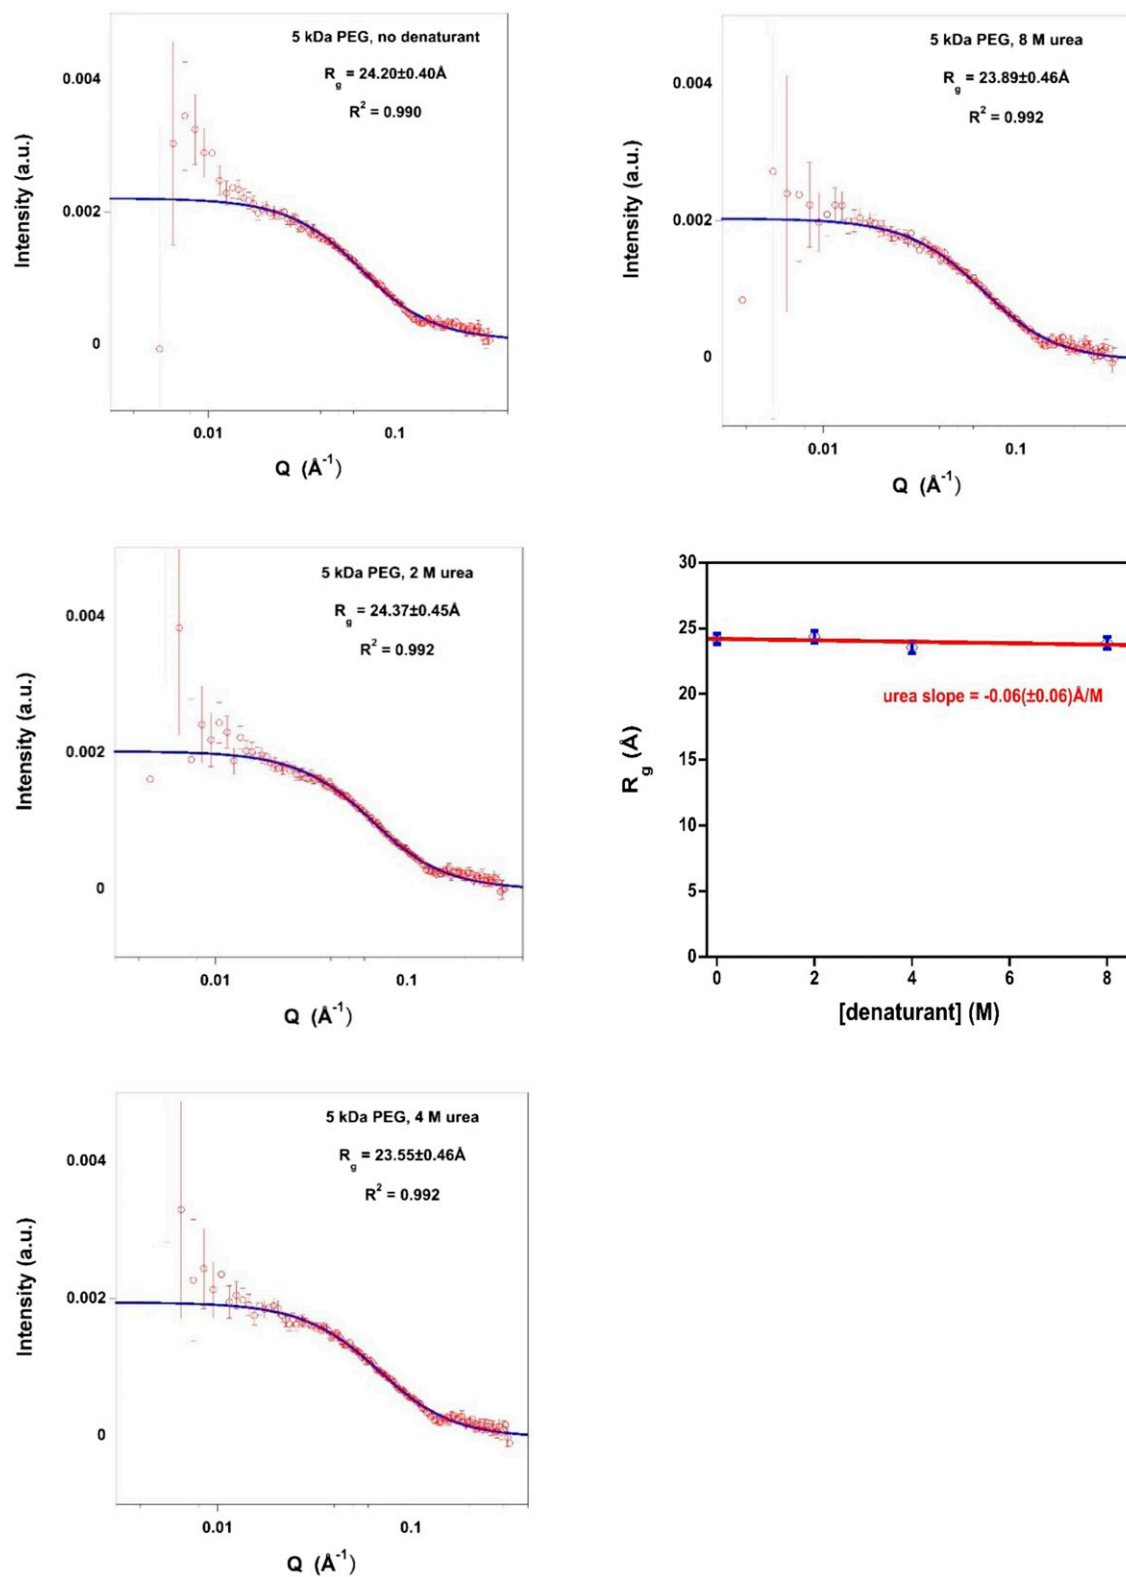

Fig. S4. Debye fits of 5 kDa PEG; as is true for 3 kDa PEG (Fig. 3 and Figs. S1 and S2), we observe no statistically significant change in the dimensions of 5 kDa PEG as a function of urea concentration.

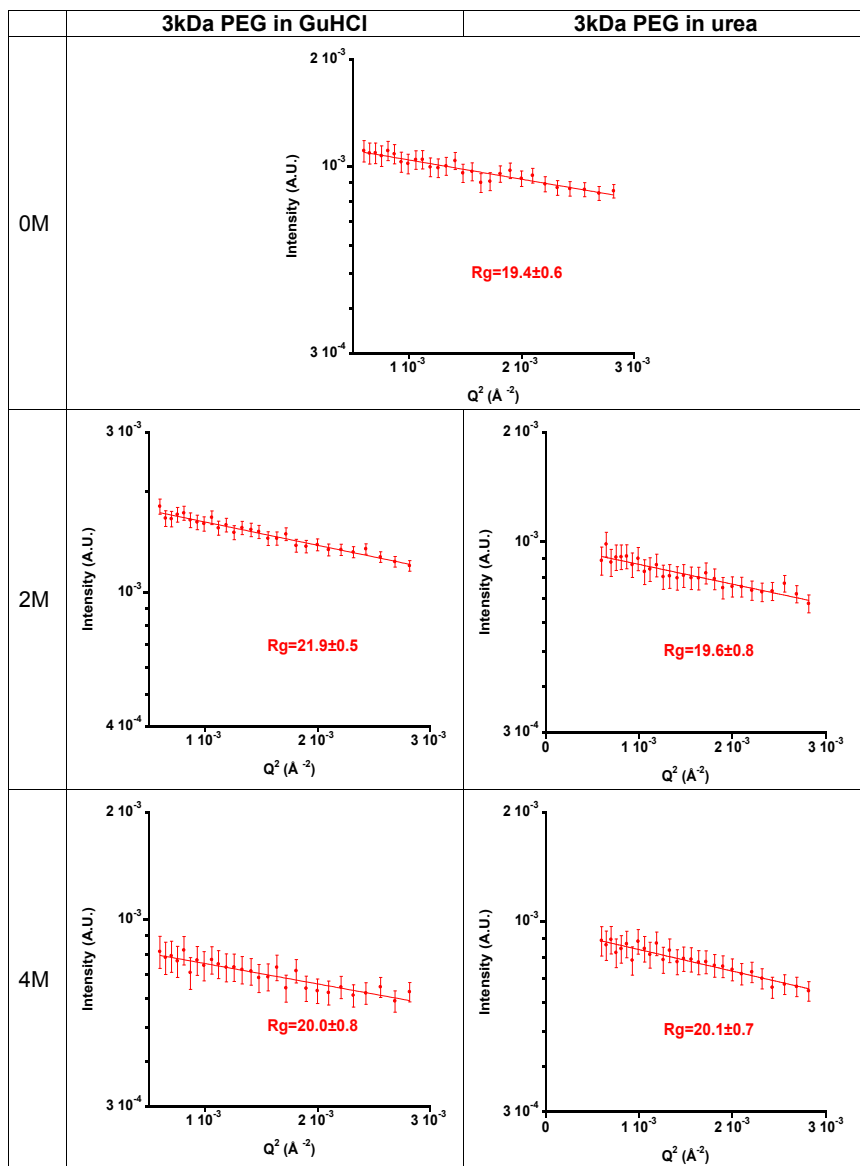

Fig. S5. (Continued)

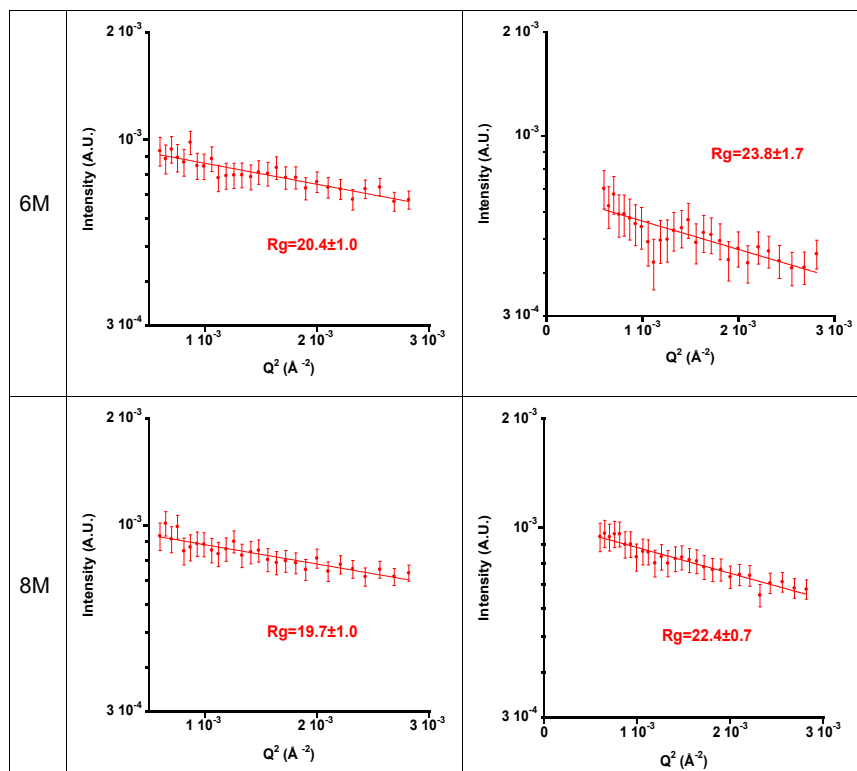

Fig. S5. Guinier fits to the SANS data for 3 kDa PEG.

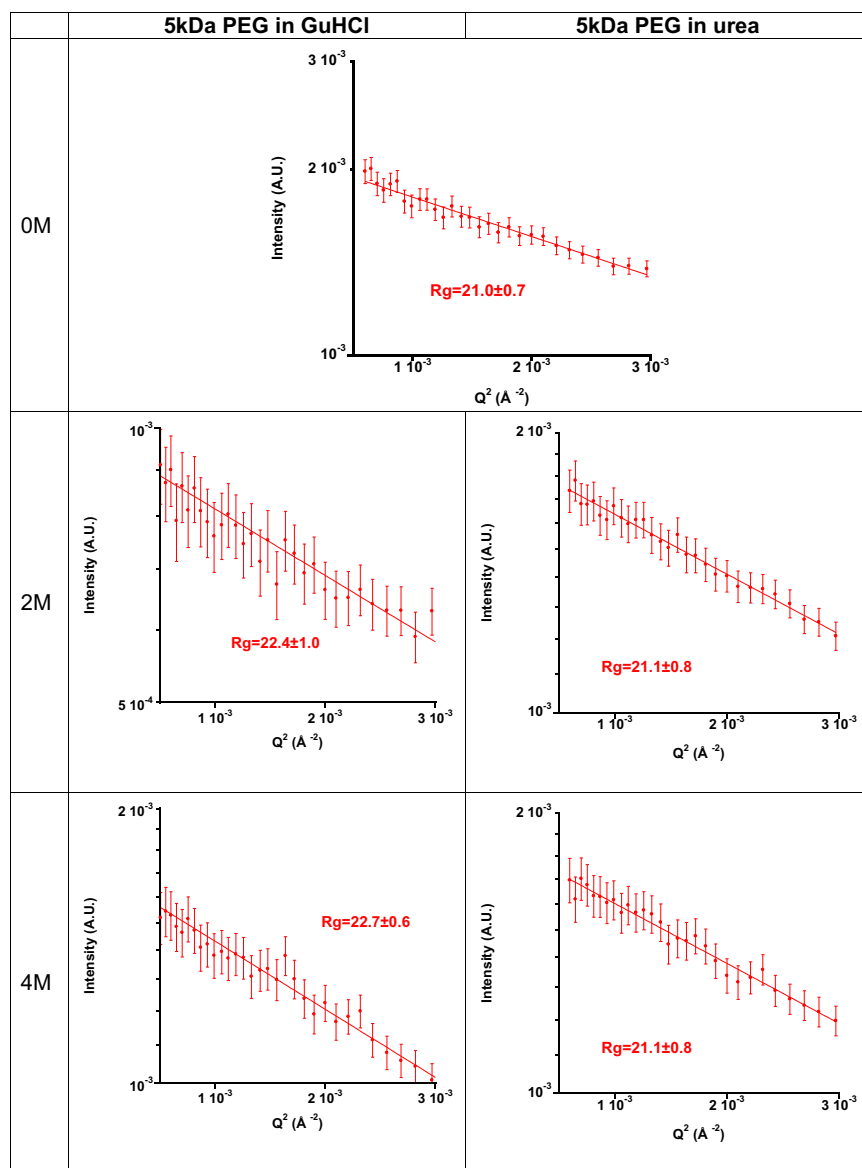

Fig. S6. (Continued)

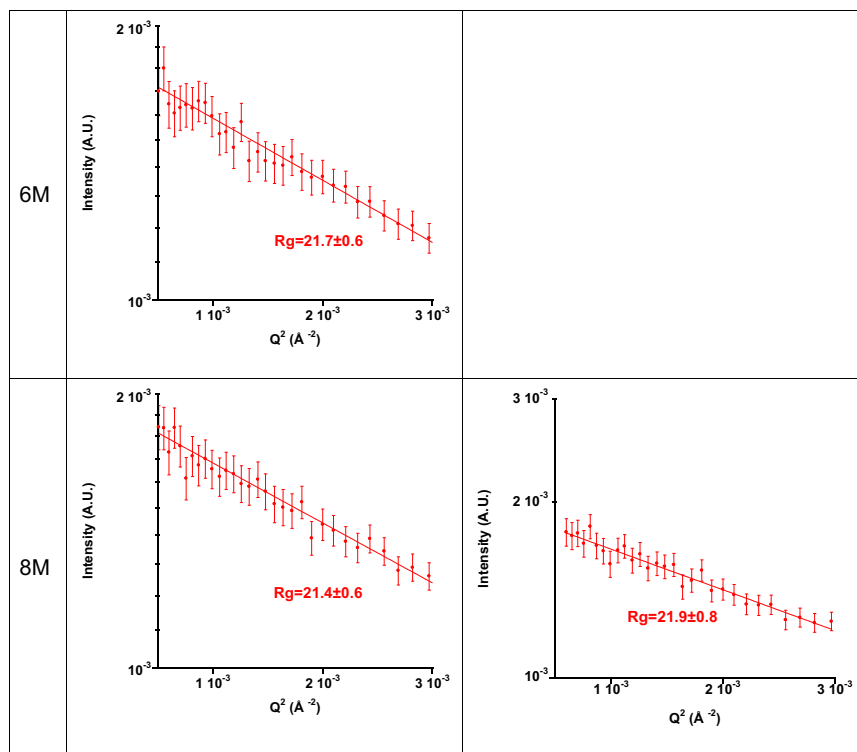

Fig. S6. Guinier fits to the SANS data for 5 kDa PEG.



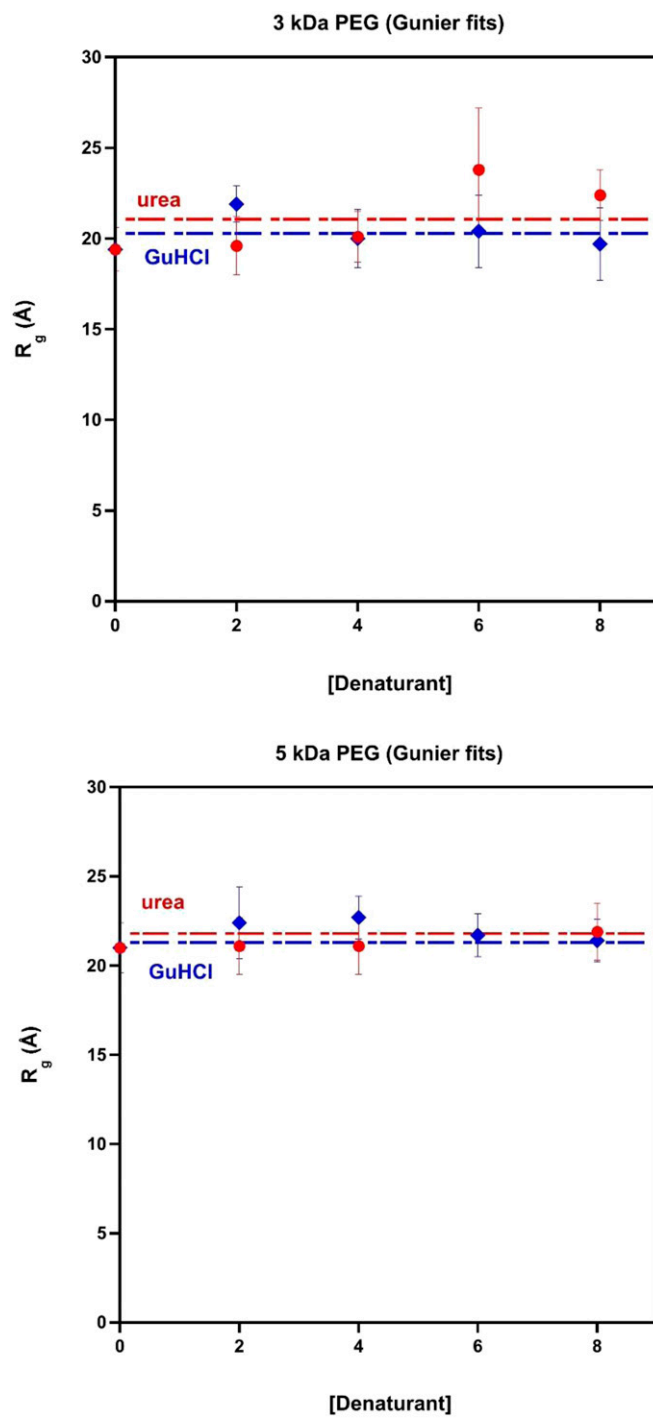

Fig. S7. Guinier-derived  $R_g$  values are within 95% confidence intervals of the average value (dashed lines) observed in each denaturant.

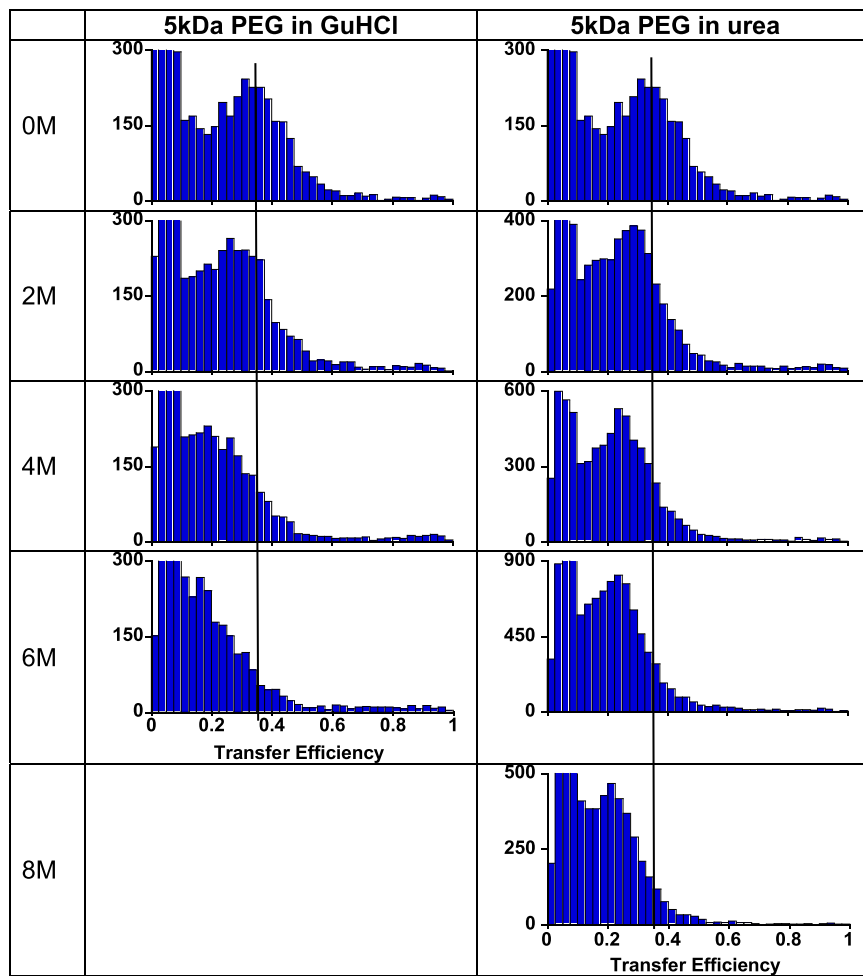

Fig. S8. The denaturant dependence of the transfer efficiency observed for dye-modified 5 kDa PEG is quite similar to that observed for dye-modified 3 kDa PEG (Fig. 4).
